# Supplementary material
Source: PubMed Central journal article supplement (PMC341788)

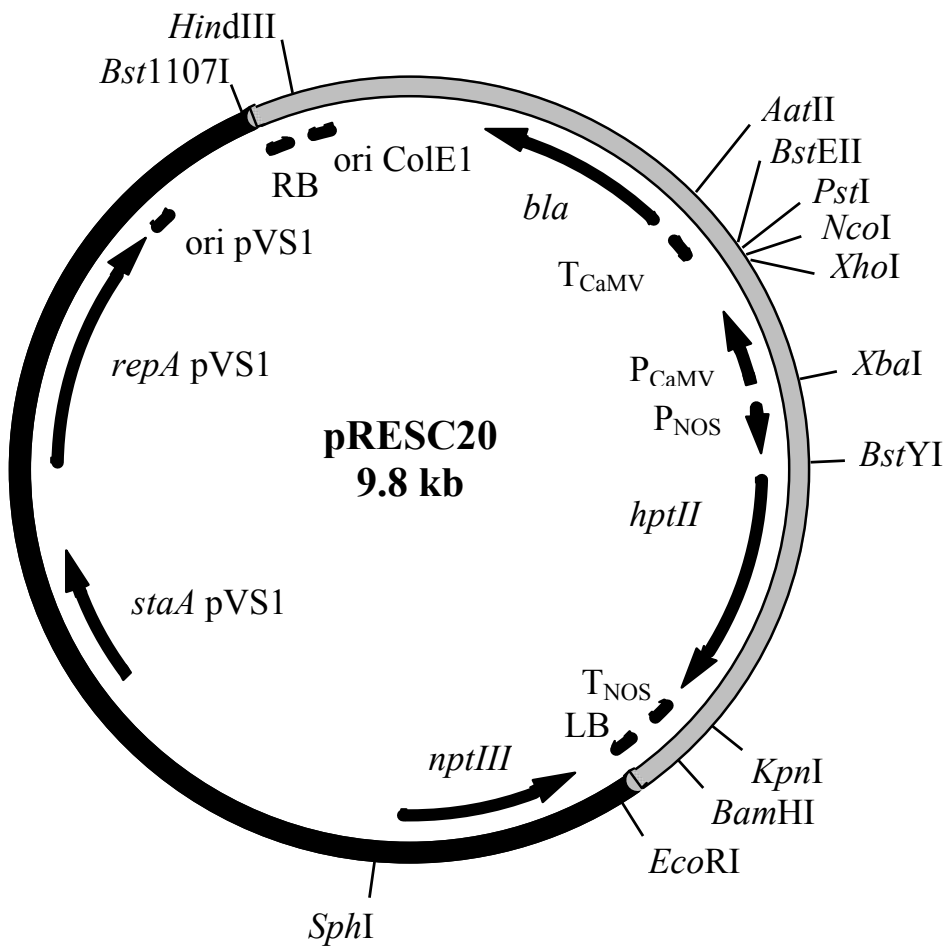

Supplement: pnas_0305096101_5.pdf [file pnas_0305096101_5.pdf]

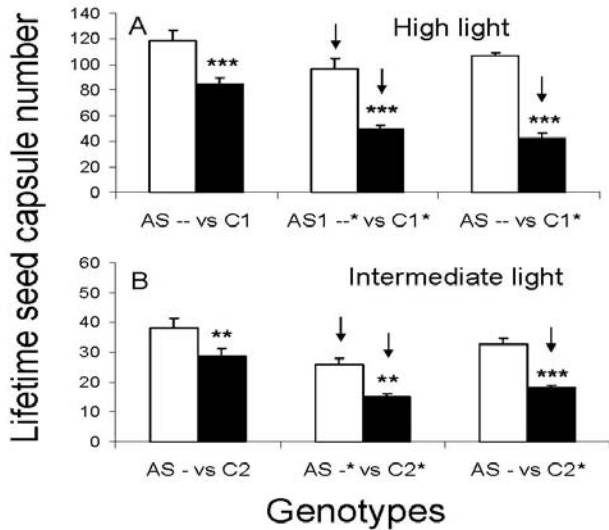

Supplement: pnas_0305096101_7.pdf [file pnas_0305096101_7.pdf]
